# Supplementary material for: High power density output and durability of microbial fuel cells enabled by dispersed cobalt nanoparticles on nitrogen-doped carbon as the cathode electrocatalyst
Source: Royal Society of Chemistry journal article supplement (doi:10.1039/d3cp02582a), 2023-01-01
Supplement: d3cp02582a1.pdf [file d3cp02582a1.pdf]

## Supporting Information

# High Power Density Output and Durability of Microbial Fuel Cell Enabled by Dispersed Cobalt Nanoparticles on Nitrogen-Doped Carbon as Cathode Electrocatalyst

Yuxian Yang<sup>a</sup>, Jialuo Lin<sup>a</sup>, Xin Li<sup>a</sup>, Zhuoyue Chen<sup>a</sup>, Yingyu Lin<sup>a</sup>, Mengqing Xu<sup>a,b</sup>,  
Weishan Li<sup>a,b\*</sup>

a. School of Chemistry, South China Normal University, Guangzhou 510006, China

b. National and Local Joint Engineering Research Center of MPTES in High Energy and Safety LIBs, Engineering Research Center of MTEES (Ministry of Education), and Key Lab. of ETESPG(GHEI), South China Normal University, Guangzhou 510006, Guangzhou, China

Corresponding Authors: [liwsh@scnu.edu.cn](mailto:liwsh@scnu.edu.cn)

---

\* Corresponding author at: School of Chemistry, South China Normal University, Guangzhou 510006, China.

Email address: [liwsh@scnu.edu.cn](mailto:liwsh@scnu.edu.cn) (W. Li).

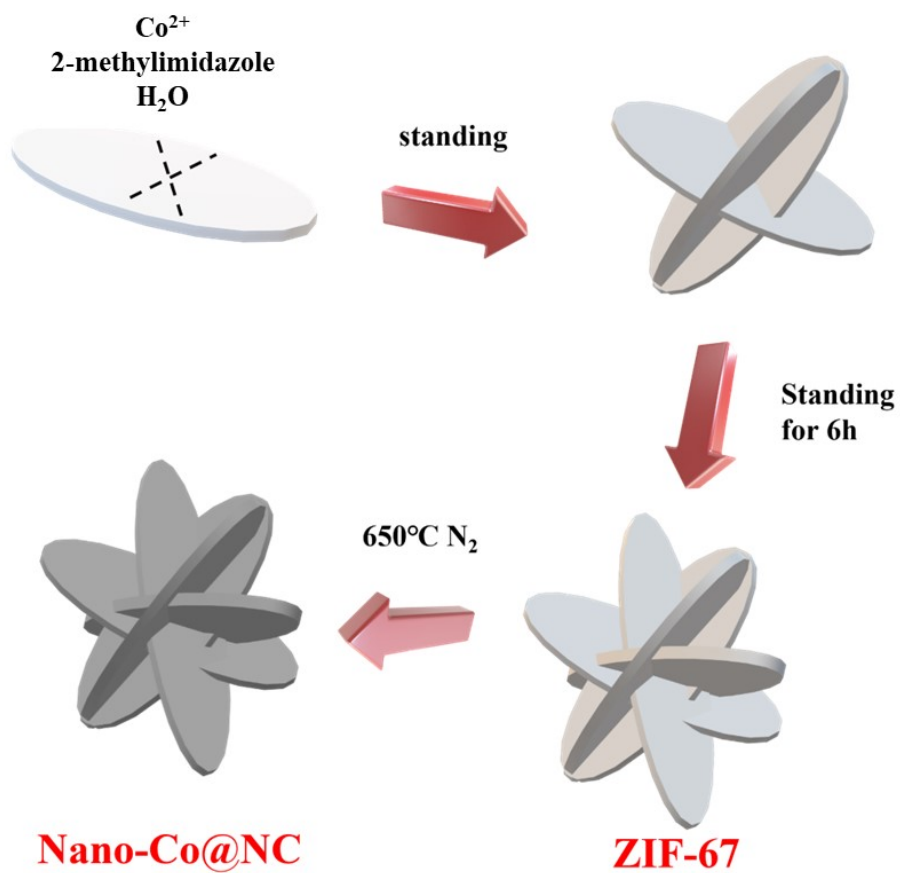

**Fig. S1** Schematic synthesis of Nano-Co@NC from ZIF-67.

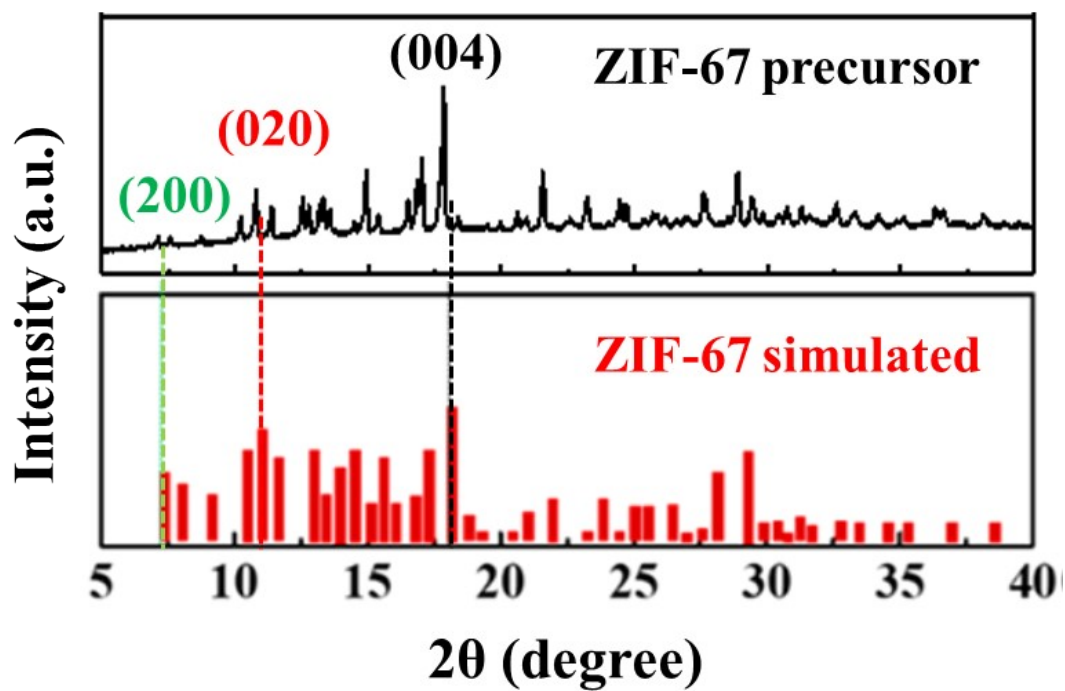

Fig. S2 XRD pattern of resultant ZIF-67 precursor.

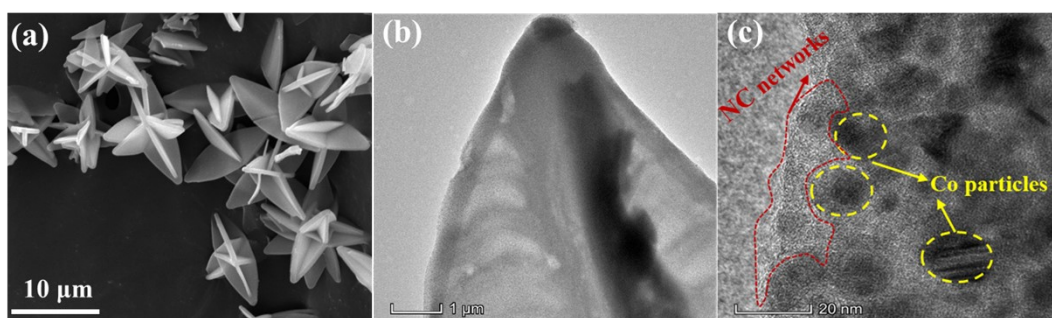

**Fig. S3** SEM image of Nano-Co@NC (a), further microstructure of Nano-Co@NC: TEM image (b) and high-resolution TEM image (c).

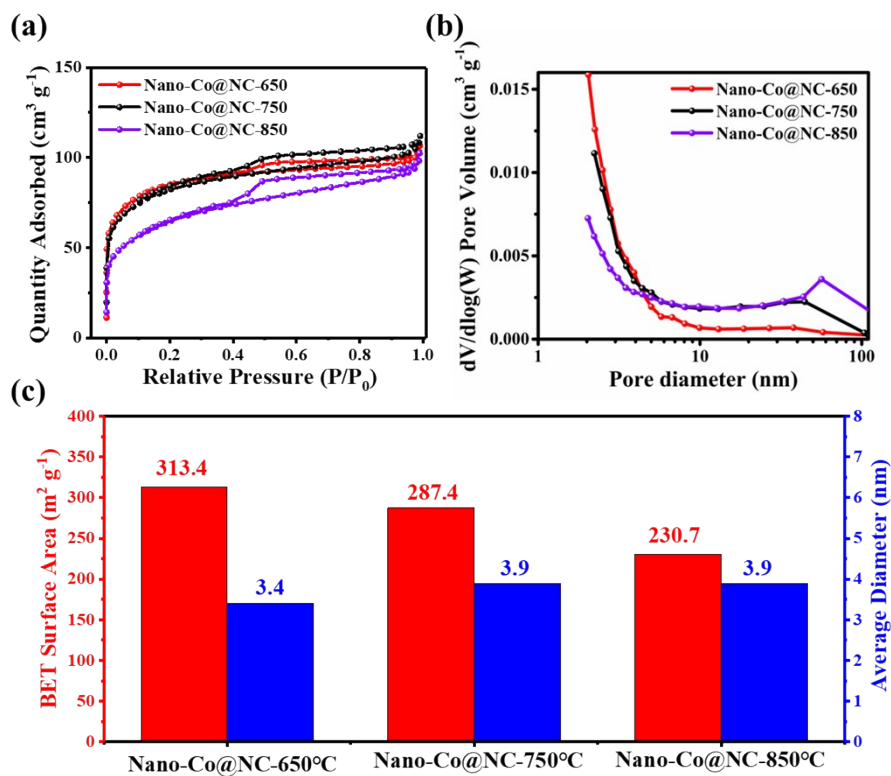

**Fig. S4** Nitrogen adsorption-desorption isotherms (a), pore diameter distribution (b) and BET surface area and average pore diameter (c) of Nano-Co@NC samples obtained under different calcination temperatures.

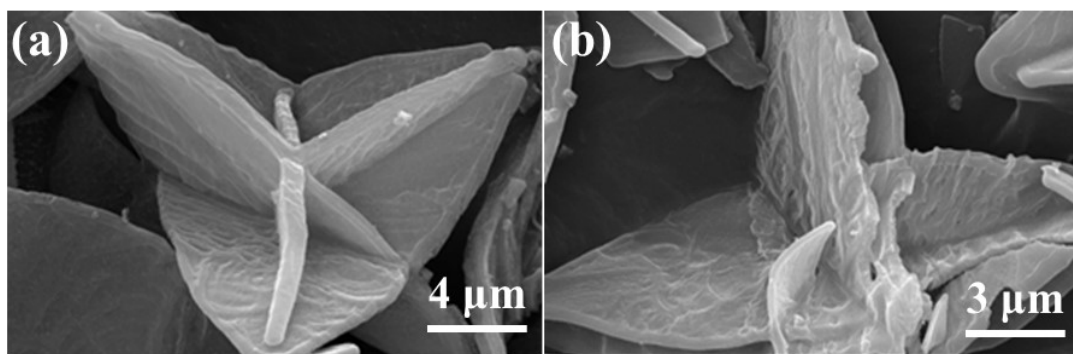

**Fig. S5** SEM images of Nano-Co@NC-750 (a) and Nano-Co@NC-850 (b).

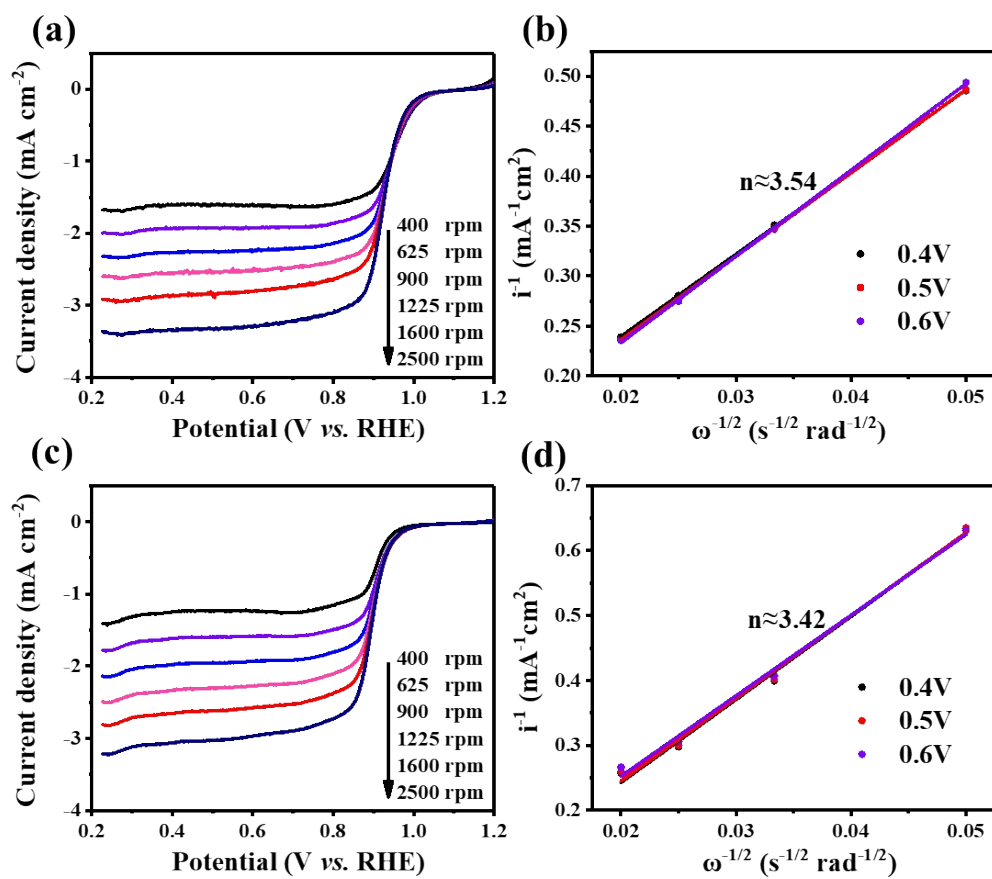

**Fig. S6** ORR polarization curve (a,c) and corresponding K-L curves (b,d) of Nano-Co@NC-750 (a,b) and Nano-Co@NC-850 (c,d) in O<sub>2</sub>-saturated 1 M KOH solution at various rotation speeds.

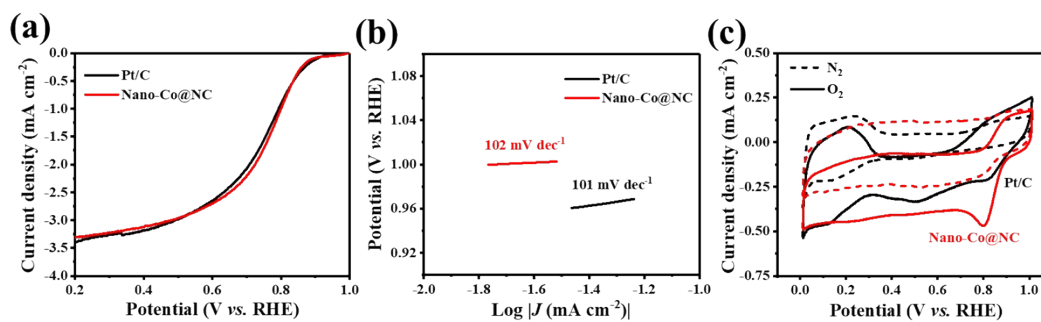

**Fig. S7** Linear sweep voltammograms of different electrodes in O<sub>2</sub> saturated 50 mM PBS solution at 1600 rpm with a scan rate of 5 mV·s<sup>-1</sup> (a), and corresponding Tafel plots (b); cyclic voltammograms of Nano-Co@NC and Pt/C electrodes in N<sub>2</sub>- and O<sub>2</sub>-saturated 50 mM PBS solution with a scan rate of 5 mV·s<sup>-1</sup>.



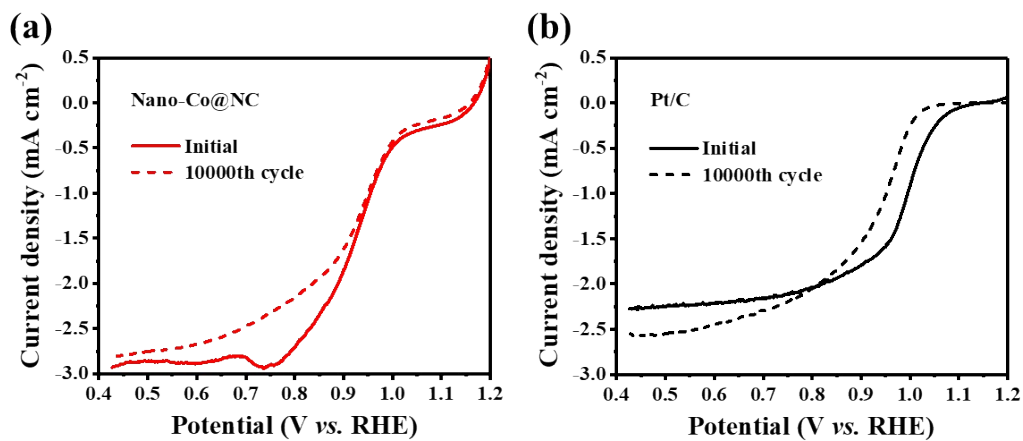

**Fig. S8** Linear sweep voltammograms of Nano-Co@NC (a) and Pt/C (b) electrodes with a scan rate of  $5 \text{ mV}\cdot\text{s}^{-1}$  before and after cyclic voltammetry between 0.8 V and 1.0 V at  $50 \text{ mV}\cdot\text{s}^{-1}$  for 10 000 cycles.

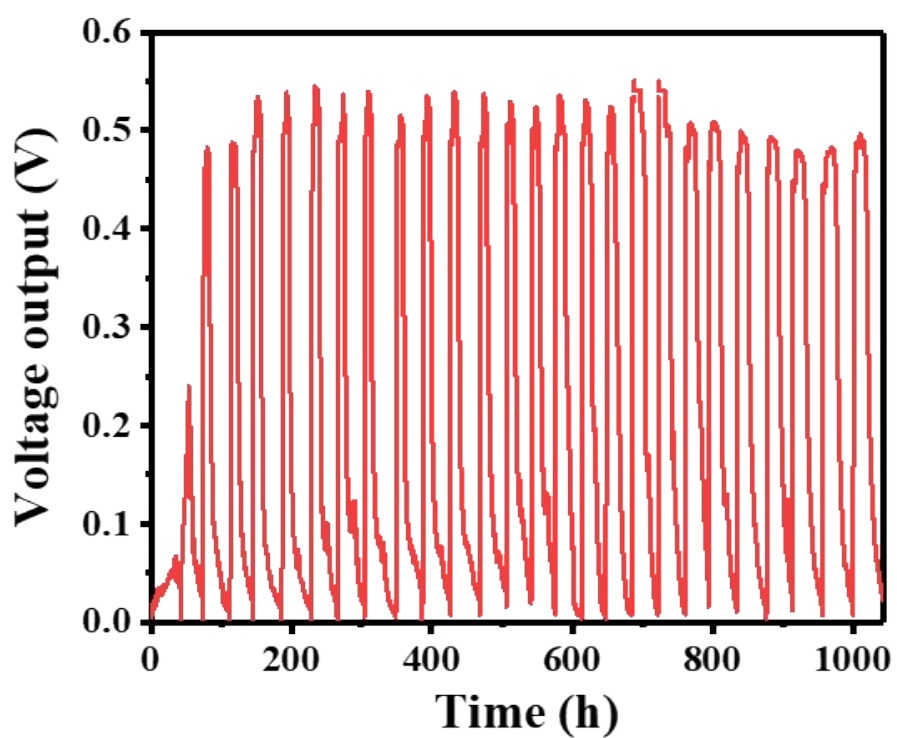

**Fig. S9** Voltage output of the MFC equipped with Nano-Co@NC cathode electrocatalyst during 45 days' operations with 1000  $\Omega$  resistance loading.

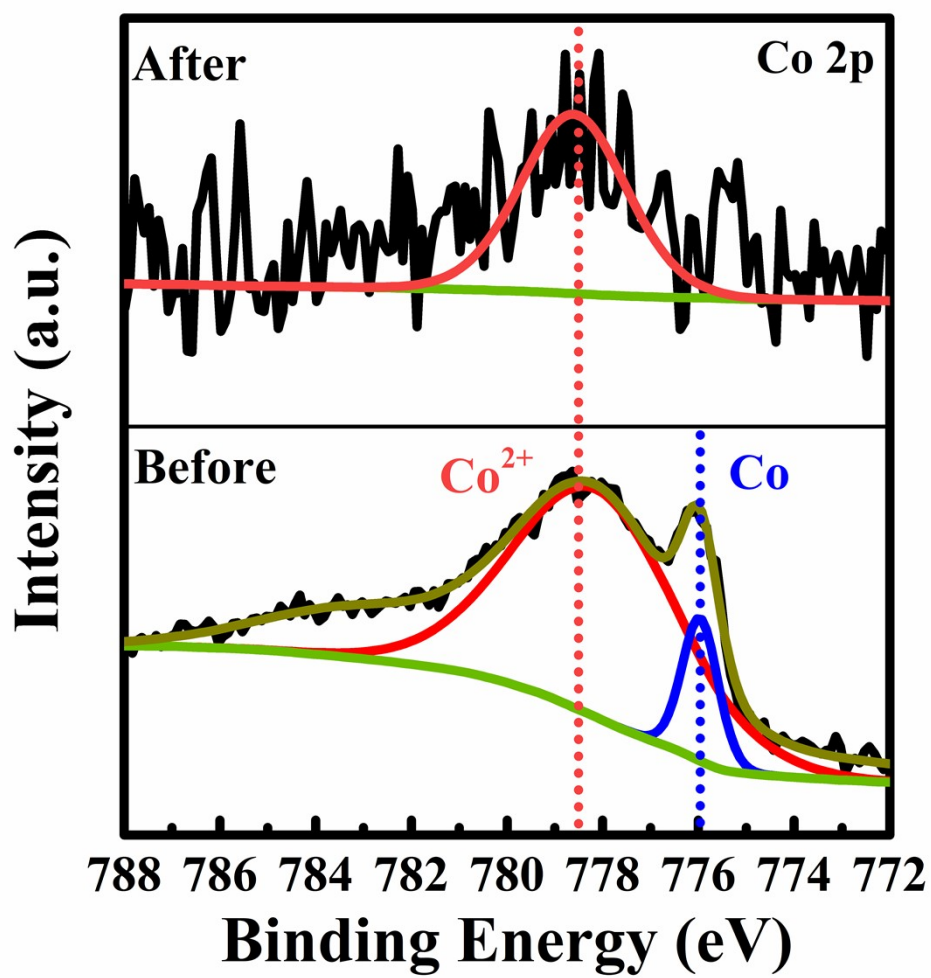

**Fig. S10** XPS Co 2p spectra of Nano-Co@NC before and after 45 days' operations in the MFC with 1000  $\Omega$  resistance loading.

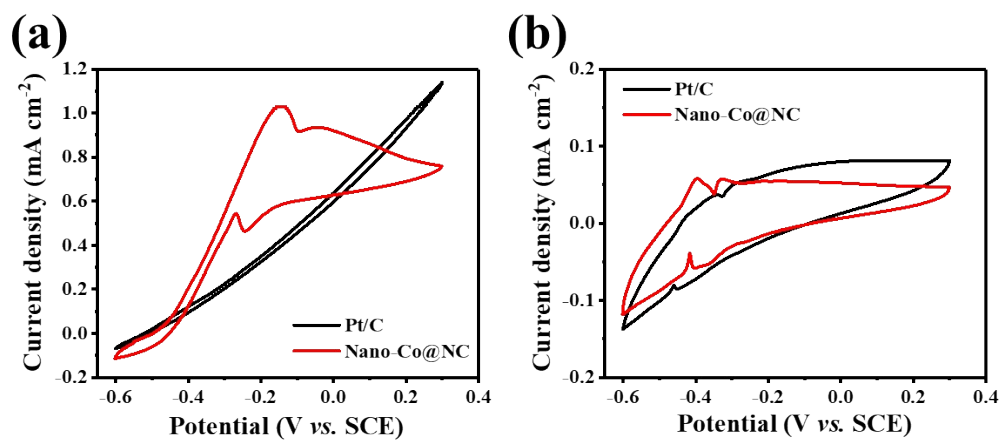

**Fig. S11** Cyclic voltammograms of anodes from the MFCs after 1 month's batch mode operations, in the solutions with (a) and without (b) 1 g·L<sup>-1</sup> sodium acetate. Scan rate: 1 mV·s<sup>-1</sup>.

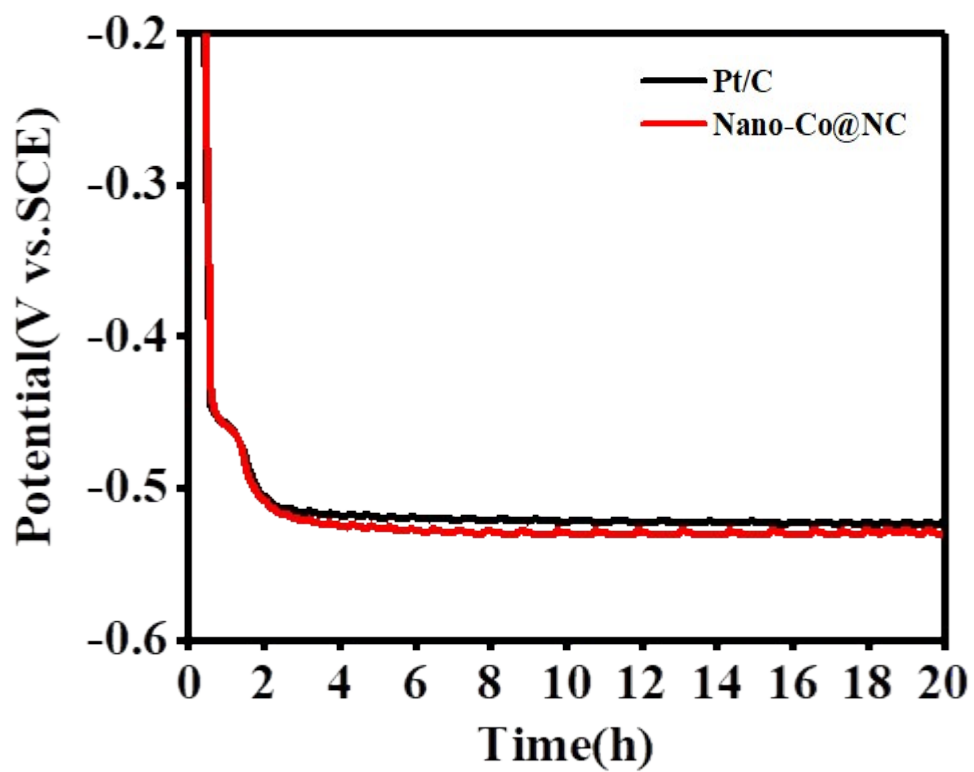

Fig. S12 Potential response of the anodes taken from the MFCs after 1 month's batch mode operations under a constant current of  $0.1 \mu\text{A}$ .

**Table S1.** XPS element compositions of Nano-Co@NC samples.

| <b>Samples</b>        | <b>Co at%</b> | <b>N at%</b> | <b>C at%</b> |
|-----------------------|---------------|--------------|--------------|
| <b>Nano-Co@NC-650</b> | 59.17         | 0.60         | 40.23        |
| <b>Nano-Co@NC-750</b> | 48.40         | 1.30         | 50.30        |
| <b>Nano-Co@NC-850</b> | 29.23         | 2.60         | 68.17        |

**Table S2.** A comparison of atomic percentages in Nano-Co@NC with Co<sub>3</sub>O<sub>4</sub>-NC/CF reported in reference.

| <b>Material</b>                       | <b>Co at%</b> | <b>N at%</b> | <b>C at%</b> | <b>Ref.</b>     |
|---------------------------------------|---------------|--------------|--------------|-----------------|
| Nano-Co@NC                            | 59.17         | 2.60         | 38.24        | this work       |
| Co <sub>3</sub> O <sub>4</sub> -NC/CF | 19.00         | 0.56         | 19.87        | Li et al., 2021 |

**Table S3.** Comparison in electrocatalytic activity of Nano-Co@NC toward ORR in alkaline electrolyte with those reported in literature.

| <b>Catalyst</b>                            | <b>E<sub>onset</sub></b><br><b>(V vs. RHE)</b> | <b>E<sub>1/2</sub></b><br><b>(V vs. RHE)</b> | <b>Tafel slope</b><br><b>(mV dec<sup>-1</sup>)</b> | <b>Ref.</b> |
|--------------------------------------------|------------------------------------------------|----------------------------------------------|----------------------------------------------------|-------------|
| Nano-Co@NC                                 | 0.98                                           | 0.9                                          | 31                                                 | this work   |
| ZIF-L-D-Co <sub>3</sub> O <sub>4</sub> /CC | 0.97                                           | 0.9                                          | 68                                                 | 1           |
| Co <sub>0.8</sub> -N-OMC                   | 0.79                                           | 0.59                                         | —                                                  | 2           |
| Co <sub>3</sub> O <sub>4</sub> -NC/CF      | 0.92                                           | 0.78                                         | 98                                                 | 3           |
| 3DHP Co-N-C                                | 0.82                                           | 0.72                                         | 67.4                                               | 4           |
| Cu/NC                                      | 0.76                                           | 0.3                                          | 134                                                | 5           |
| Co@NC-Co <sub>1</sub> Zn <sub>3</sub>      | 0.84                                           | 0.68                                         | —                                                  | 6           |
| Fe, N-AC                                   | 0.95                                           | 0.87                                         | —                                                  | 7           |



**Table S4.** Comparison in electrocatalytic activity of Nano-Co@NC toward ORR in weak alkaline or neutral electrolytes with those reported in literature.

| <b>Catalyst</b>                                         | <b>Electrolyte</b> | <b>E<sub>onset</sub></b><br><b>(V vs. RHE)</b> | <b>E<sub>1/2</sub></b><br><b>(V vs. RHE)</b> | <b>Ref.</b> |
|---------------------------------------------------------|--------------------|------------------------------------------------|----------------------------------------------|-------------|
| <b>Nano-Co@NC</b>                                       | 0.05 M PBS         | 0.91                                           | 0.75                                         | this work   |
| <b>Co-N<sub>x</sub>/C-MnO</b>                           | 0.1 M KOH          | 0.93                                           | 0.87                                         | 8           |
| <b>Fe<sub>x</sub>Co<sub>9-x</sub>S<sub>8</sub>-NHCS</b> | 0.1 M KOH          | 0.92                                           | 0.79                                         | 9           |
| <b>Hollow Fe-N/C-800</b>                                | 0.1 M PBS          | 0.99                                           | 0.81                                         | 10          |

**Table S5.** Comparison in power output of MFCs based on Nano-Co@C cathode electrocatalyst with those reported in literature.

| <b>Cathode catalysts</b>                    | <b>Inoculum</b> | <b>Substrate</b> | <b>P<sub>max</sub> (mW m<sup>-2</sup>)</b> | <b>Ref.</b> |
|---------------------------------------------|-----------------|------------------|--------------------------------------------|-------------|
| <b>Nano-Co@NC</b>                           | Mixed           | sodium acetate   | 1769                                       | this work   |
| <b>NiFe-LDH@Co<sub>3</sub>O<sub>4</sub></b> | Mixed           | glucose          | 467.35±8.27                                | 11          |
| <b>Mn-Fe@g-C<sub>3</sub>N<sub>4</sub></b>   | Mixed           | sodium acetate   | 413±7                                      | 12          |
| <b>3DHP Co-N-C</b>                          | Mixed           | glucose          | 426.95±7.87                                | 4           |
| <b>Co<sub>3</sub>O<sub>4</sub>-NC/CF</b>    | Mixed           | sodium acetate   | 1560                                       | 3           |
| <b>Cu/NC</b>                                | Mixed           | sodium acetate   | 489.2                                      | 5           |
| <b>Co@NC-Co<sub>1</sub>Zn<sub>3</sub></b>   | Mixed           | sodium acetate   | 1039                                       | 6           |
| <b>CoNi-LDH@CNFs</b>                        | Mixed           | sodium acetate   | 1390.37                                    | 13          |

## References:

- 1 Y. Zhong, Z. Pan, X. Wang, J. Yang, Y. Qiu, S. Xu, Y. Lu, Q. Huang and W. Li, *Adv Sci (Weinh)*, 2019, 6, 1802243.
- 2 S. Zhuang, C. Shao, J. Ye, B. Li and X. Wang, *Environ Res*, 2020, 191, 110195.
- 3 X. Li, Y. Lin, Y. Yang, W. Zhang, M. Hu, Y. Zhong, Y. Liao and W. Li, *Electrochimica Acta*, 2021, 391.
- 4 Q. R. Pan, P. Y. Jiang, B. L. Lai, Y. B. Qian, L. J. Huang, X. X. Liu, N. Li and Z. Q. Liu, *Chemosphere*, 2022, 291, 132701.
- 5 S. K. Dhillon, A. Chaturvedi, D. Gupta, T. C. Nagaiah and P. P. Kundu, *Environ Sci Pollut Res Int*, 2022, 29, 80787-80804.
- 6 G. Lan, H. Li and J. Shen, *International Journal of Hydrogen Energy*, 2022, 47, 10701-10714.
- 7 H. Karimi-Maleh, C. Karaman, O. Karaman, F. Karimi, Y. Vasseghian, L. Fu, M. Baghayeri, J. Rouhi, P. Senthil Kumar, P.-L. Show, S. Rajendran, A. L. Sanati and A. Mirabi, *Journal of Nanostructure in Chemistry*, 2022, 12, 429-439.
- 8 C. Chen, Z. J. Tang, J. Y. Li, C. Y. Du, T. Ouyang, K. Xiao and Z. Q. Liu, *Advanced Functional Materials*, 2022, 33.
- 9 S.-J. Li, Y. Xie, B.-L. Lai, Y. Liang, K. Xiao, T. Ouyang, N. Li and Z.-Q. Liu, *Chinese Journal of Catalysis*, 2022, 43, 1502-1510.
- 10 X. T. Wu, L. J. Peng, K. Xiao, N. Li and Z. Q. Liu, *Chem Commun (Camb)*, 2021, 57, 5258-5261.
- 11 L. Jiang, J. Chen, D. Han, S. Chang, R. Yang, Y. An, Y. Liu and F. Chen, *Journal of Power Sources*, 2020, 453.
- 12 K. Zhong, Y. Wang, Q. Wu, H. You, H. Zhang, M. Su, R. Liang, J. Zuo, S. Yang and J. Tang, *Journal of Power Sources*, 2020, 467.
- 13 H. Y. Li, Y. X. Sun, J. A. Wang, Y. F. Liu and C. J. Li, *Applied Catalysis B-Environmental*, 2022, 307.
